# Supplementary material for: Tailored anisotropic magnetic conductive film assembled from graphene-encapsulated multifunctional magnetic composite microspheres
Source: Royal Society of Chemistry journal article supplement (doi:10.1039/c1jm13216d), 2011-11-02
Supplement: c1jm13216d.pdf [file c1jm13216d.pdf]

# Electronic Supplementary Information

Tailored anisotropic magnetic conductive film assembled from  
graphene-encapsulated multifunctional magnetic composite microspheres

*Jianhua Shen, Yihua Zhu,\* Kangfu Zhou, Xiaoling Yang, Chunzhong Li*

Key Laboratory for Ultrafine Materials of Ministry of Education, School of Materials Science and  
Engineering, East China University of Science and Technology, 130 Meilong Road, Shanghai  
200237, China

\*Corresponding author: Tel.: +86-21-64252022, Fax: +86-21-64250624

E-mail address: yhzhu@ecust.edu.cn (Y. Zhu)

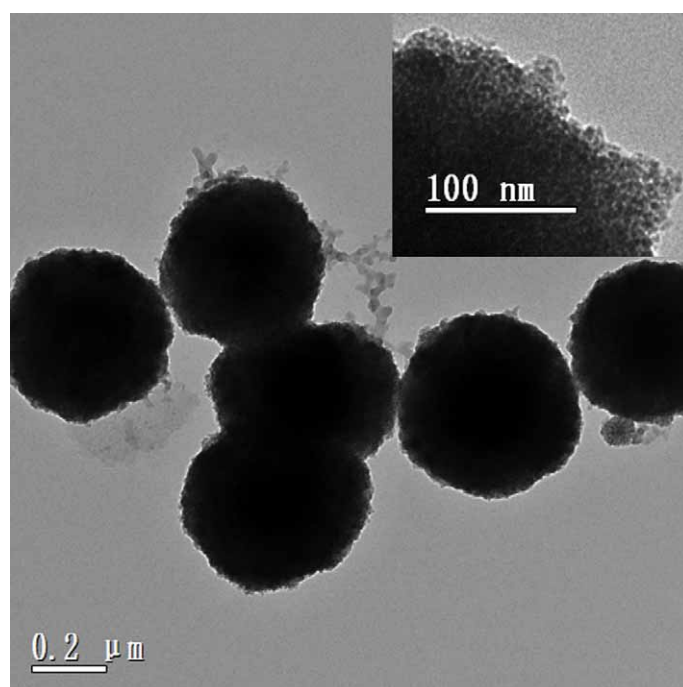

**Fig. S1** TEM image of Fe<sub>3</sub>O<sub>4</sub> particles, inset is the enlarged TEM image.

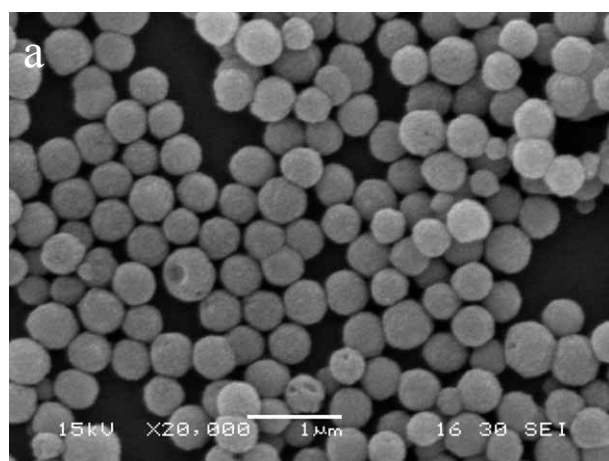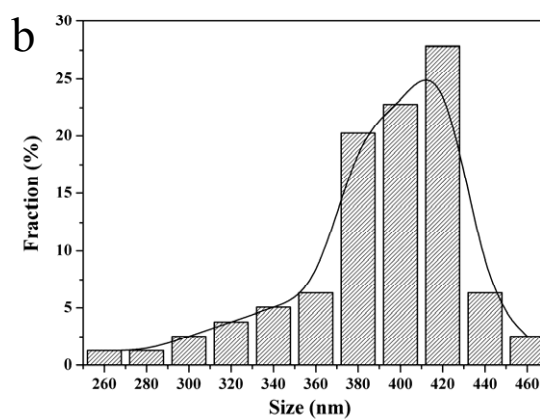

**Fig. S2** (a) SEM image of Fe<sub>3</sub>O<sub>4</sub> particles. (b) Diameter distribution of Fe<sub>3</sub>O<sub>4</sub> particles.

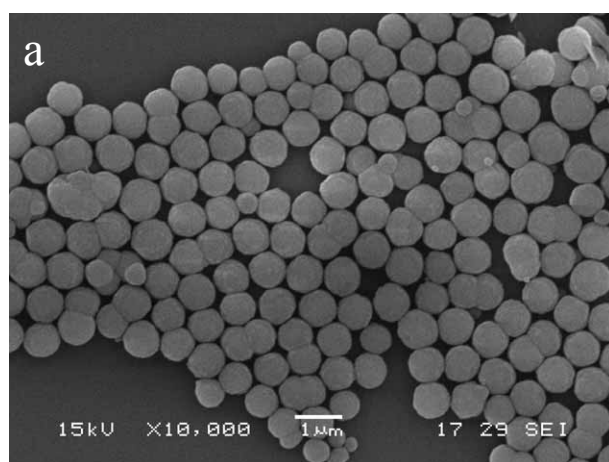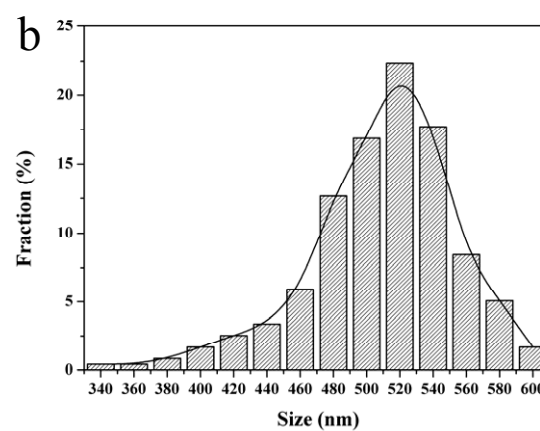

**Fig. S3** (a) SEM image of Fe<sub>3</sub>O<sub>4</sub>@SiO<sub>2</sub> microspheres. (b) Diameter distribution of Fe<sub>3</sub>O<sub>4</sub>@SiO<sub>2</sub> microspheres.

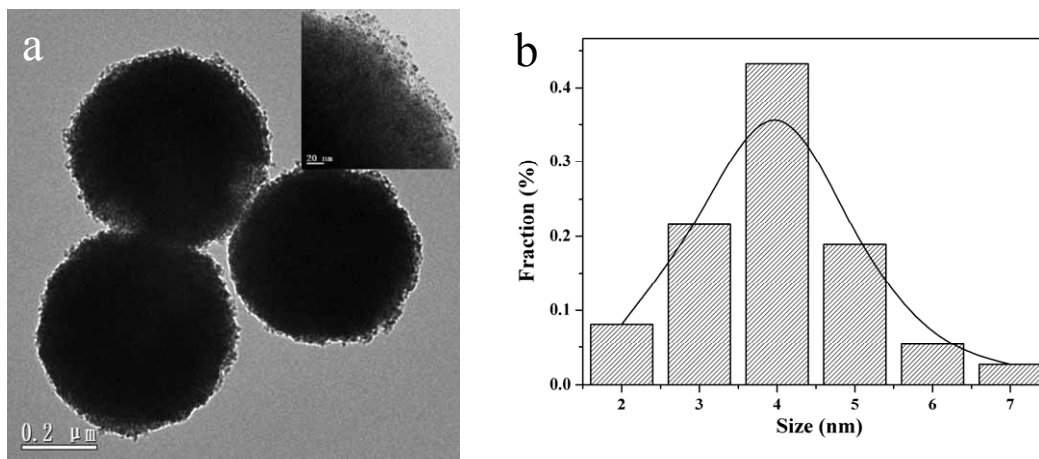

**Fig. S4** (a) TEM image of Fe<sub>3</sub>O<sub>4</sub>@SiO<sub>2</sub>@Au-seed microspheres, inset is the enlarged TEM image. (b) Column plot of gold nanoparticles size distribution on Fe<sub>3</sub>O<sub>4</sub>@SiO<sub>2</sub>@Au-seed microspheres

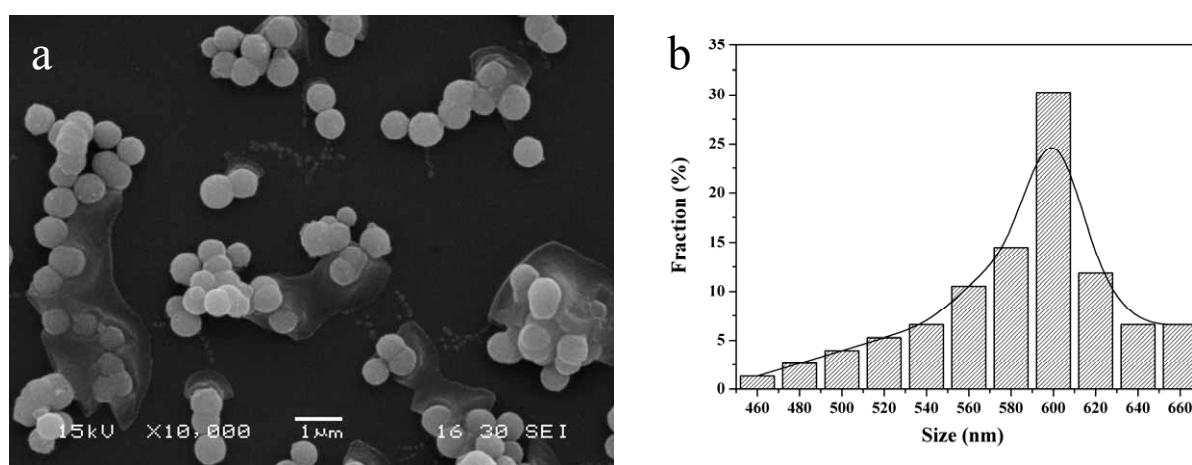

**Fig. S5** (a) SEM image of Fe<sub>3</sub>O<sub>4</sub>@SiO<sub>2</sub>@Au microspheres. (b) Diameter distribution of Fe<sub>3</sub>O<sub>4</sub>@SiO<sub>2</sub>@Au microspheres.

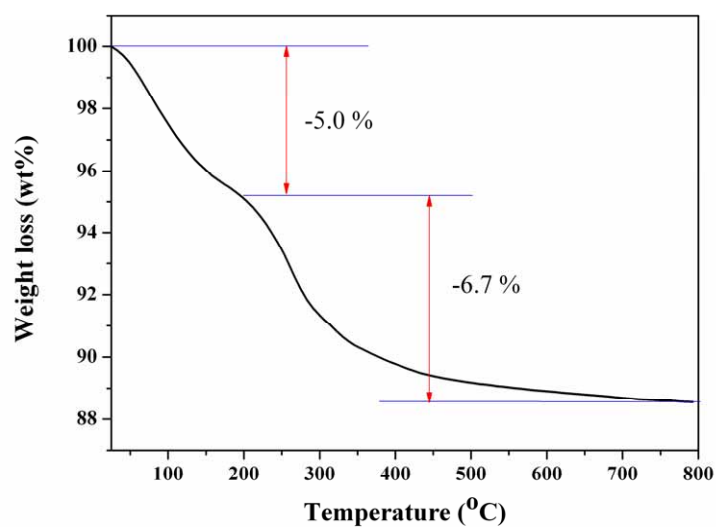

**Fig. S6** TGA curve of rGOE-Ms.

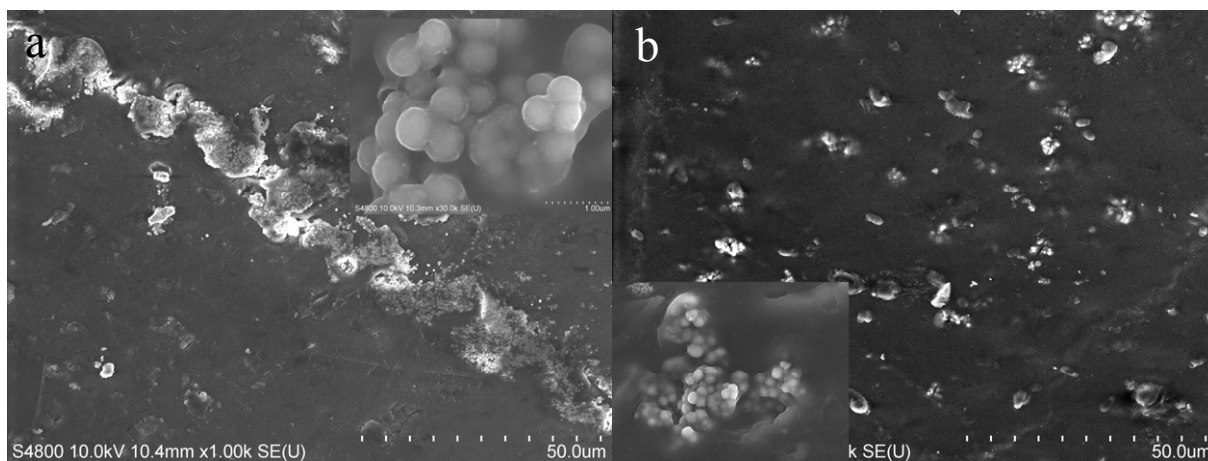

**Fig. S7** SEM images of (a) the anisotropic conductive film (ACF) and (b) the isotropic conductive film (ICF), respectively. The insets are high-magnification SEM images.

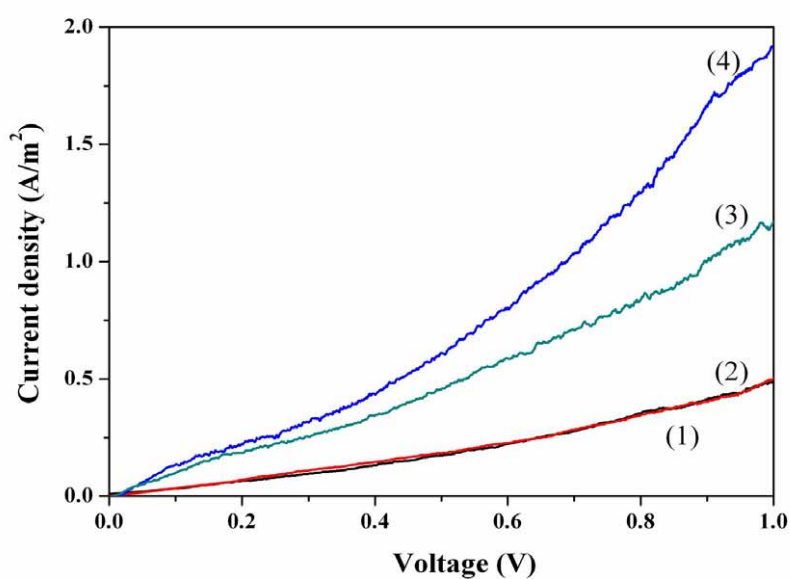

**Fig. S8** J–V characteristics of (1) the vertical and (3) the horizontal ACF assembled by  $\text{Fe}_3\text{O}_4@\text{SiO}_2@\text{rGO}$ , (2) the vertical and (4) the horizontal ACF assembled by  $\text{Fe}_3\text{O}_4@\text{SiO}_2@\text{Au}@GO$ .
